# Supplementary material
Source: publisher site journal article supplement (https://www.dovepress.com/article/477382)
Supplement: Supplementary file 1 [file get_supplementary_file.php]

**Supplementary data**

**Supplementary Table S1.** The relevant information of the antibodies for IHC staining.

|  | **Name** | **Species** | **Manufacturer** | **Catalog Number** | **Dilution** |
| --- | --- | --- | --- | --- | --- |
| Primary antibody | IL-1β | Rabbit | Goodbio, China | GB11113 | 1:200 |
| IL-6 | Rabbit | Goodbio, China | GB11117 | 1:200 |
| TNF-α | Rabbit | BIOSS, China | BA0131 | 1:200 |
| TGF-β | Rabbit | BIOSS, China | BA0290 | 1:100 |
| OCN | Rabbit | ABclonal, China | A6205 | 1:100 |
| Runx2 | Rabbit | ABclonal, China | A2851 | 1:100 |
| Collagen-2 | Rabbit | Boster, China | BA0533 | 1:200 |
| SOX9 | Mouse | BIOSS, China | bs-4177R | 1:200 |
| Secondary antibody | HRP-Goat anti Rabbit | Goat | SeraCare, USA | 5220-0336 | 1:200 |
| HRP-Goat anti Mouse | Goat | SeraCare, USA | 5220-0341 | 1:200 |


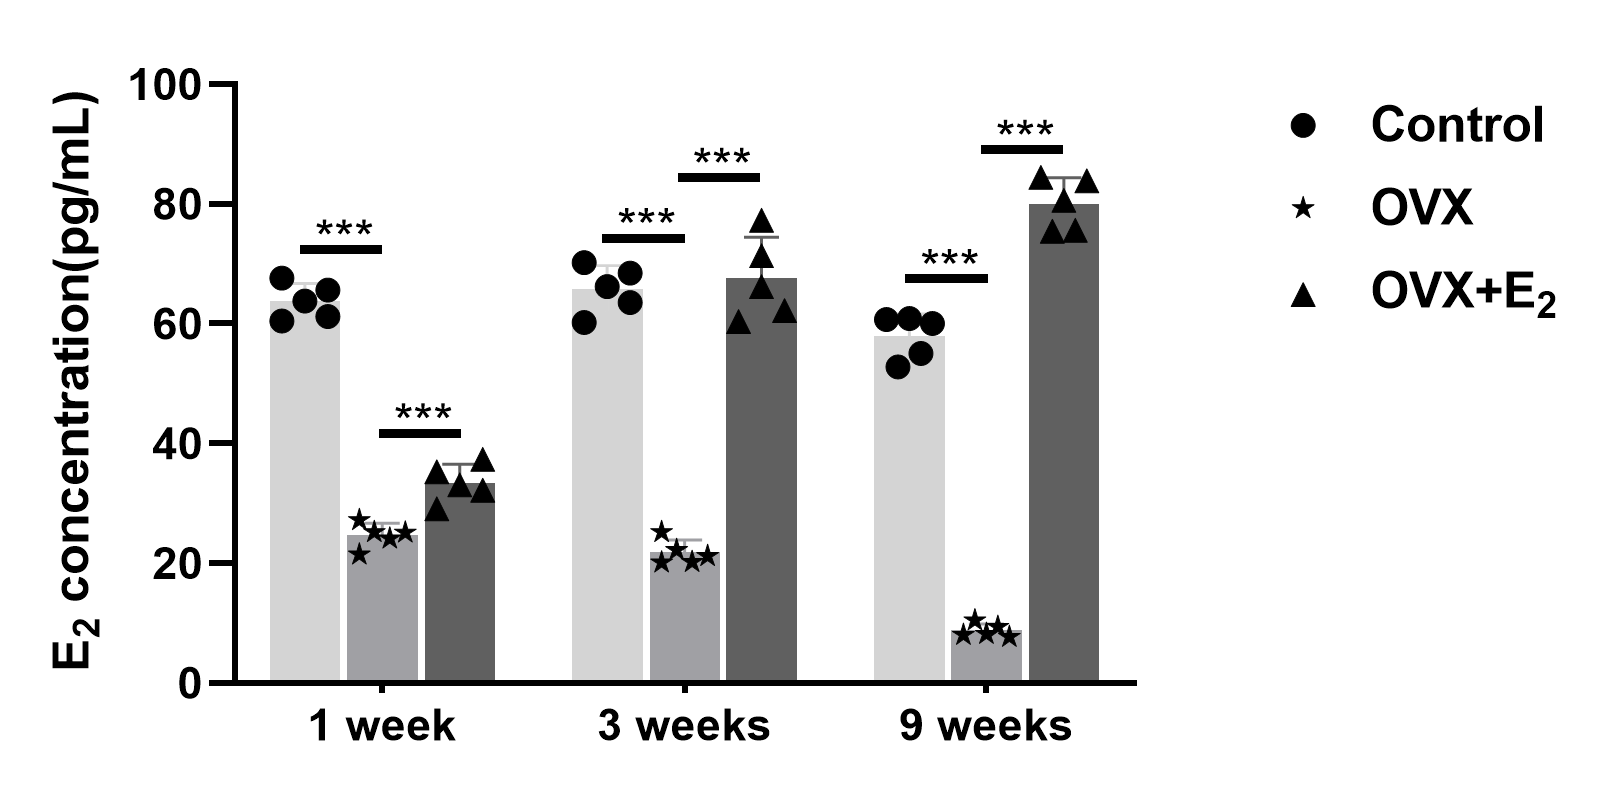


**Supplementary Figure S1**. Elisa assay showing serum estradiol levels in different groups at 1, 3, and 9 weeks after tenotomy. ***p<0.001. **Abbreviation:** OVX, ovariectomy; E2,17β-estradiol.
